# Supplementary material for: Tumor-Educated Platelets as a Promising Biomarker for Blood-Based Detection of Renal Cell Carcinoma
Source: Front Oncol. 2022 Mar 7;12:844520. doi: 10.3389/fonc.2022.844520 (PMC8936192; doi:10.3389/fonc.2022.844520)
Supplement: Supplementary file 6 [file Table_2.xlsx]

## Sheet: Sheet1
Table S2. the DEGs between RCC and control groups in our dataset.
gene_id	gene_name	log2FoldChange	padj	gene_description
ENSG00000091704	CPA1	-7.81083	2.90421e-07	carboxypeptidase A1 [Source:HGNC Symbol;Acc:HGNC:2296]
ENSG00000175535	PNLIP	-7.98326	4.3201e-07	pancreatic lipase [Source:HGNC Symbol;Acc:HGNC:9155]
ENSG00000243480	AMY2A	-7.09157	1.73453e-06	amylase alpha 2A [Source:HGNC Symbol;Acc:HGNC:477]
ENSG00000153002	CPB1	-7.13907	1.75236e-06	carboxypeptidase B1 [Source:HGNC Symbol;Acc:HGNC:2299]
ENSG00000210184	MT-TS2	-2.25648	8.20633e-06	mitochondrially encoded tRNA-Ser (AGU/C) 2 [Source:HGNC Symbol;Acc:HGNC:7498]
ENSG00000137392	CLPS	-6.72237	9.42665e-06	colipase [Source:HGNC Symbol;Acc:HGNC:2085]
novel.463	-	-8.78804	2.90364e-05	- && O00370.1 RecName: Full=LINE-1 retrotransposable element ORF2 protein; Short=ORF2p; Includes: RecName: Full=Reverse transcriptase; Includes: RecName: Full=Endonuclease && -
ENSG00000271869	AC026979.2	-2.73401	7.26861e-05	novel transcript
ENSG00000227081	AC005912.1	-1.37637	0.000230282	ribosomal protein S27 (RPS27) pseudogene
ENSG00000278196	IGLV2-8	3.08881	0.000258388	immunoglobulin lambda variable 2-8 [Source:HGNC Symbol;Acc:HGNC:5895]
ENSG00000169347	GP2	-5.87674	0.000288184	glycoprotein 2 [Source:HGNC Symbol;Acc:HGNC:4441]
ENSG00000170296	GABARAP	-1.57647	0.000300688	GABA type A receptor-associated protein [Source:HGNC Symbol;Acc:HGNC:4067]
ENSG00000142615	CELA2A	-5.60459	0.000392244	chymotrypsin like elastase 2A [Source:HGNC Symbol;Acc:HGNC:24609]
ENSG00000187479	C11orf96	4.45984	0.000983093	chromosome 11 open reading frame 96 [Source:HGNC Symbol;Acc:HGNC:38675]
novel.963	-	-4.19756	0.000983093	- && - && -
ENSG00000236875	DDX11L5	-1.96717	0.000983093	DEAD/H-box helicase 11 like 5 [Source:HGNC Symbol;Acc:HGNC:37106]
ENSG00000286755	AC135893.1	-1.42807	0.00117038	novel transcript, antisense to LMLN
ENSG00000210154	MT-TD	-1.76702	0.00131625	mitochondrially encoded tRNA-Asp (GAU/C) [Source:HGNC Symbol;Acc:HGNC:7478]
ENSG00000170890	PLA2G1B	-4.87639	0.00132749	phospholipase A2 group IB [Source:HGNC Symbol;Acc:HGNC:9030]
ENSG00000178445	GLDC	3.10214	0.00132749	glycine decarboxylase [Source:HGNC Symbol;Acc:HGNC:4313]
ENSG00000210127	MT-TA	-1.67774	0.00137515	mitochondrially encoded tRNA-Ala (GCN) [Source:HGNC Symbol;Acc:HGNC:7475]
ENSG00000144668	ITGA9	-4.2244	0.00139372	integrin subunit alpha 9 [Source:HGNC Symbol;Acc:HGNC:6145]
ENSG00000120738	EGR1	2.23976	0.00139372	early growth response 1 [Source:HGNC Symbol;Acc:HGNC:3238]
ENSG00000198695	MT-ND6	-1.47208	0.00145508	mitochondrially encoded NADH:ubiquinone oxidoreductase core subunit 6 [Source:HGNC Symbol;Acc:HGNC:7462]
ENSG00000213543	RARRES2P2	-1.77079	0.00155691	retinoic acid receptor responder 2 pseudogene 2 [Source:HGNC Symbol;Acc:HGNC:48701]
ENSG00000128276	RFPL3	-3.55067	0.00177273	ret finger protein like 3 [Source:HGNC Symbol;Acc:HGNC:9980]
ENSG00000225972	MTND1P23	-2.53751	0.00186766	MT-ND1 pseudogene 23 [Source:HGNC Symbol;Acc:HGNC:42092]
ENSG00000162896	PIGR	-4.22709	0.00192417	polymeric immunoglobulin receptor [Source:HGNC Symbol;Acc:HGNC:8968]
ENSG00000234322	ST13P18	-3.1281	0.00198843	ST13, Hsp70 interacting protein pseudogene 18 [Source:HGNC Symbol;Acc:HGNC:38861]
ENSG00000254481	PTP4A2P2	-1.17342	0.00198843	PTP4A2 pseudogene 2 [Source:HGNC Symbol;Acc:HGNC:9638]
ENSG00000175606	TMEM70	-1.71051	0.00201314	transmembrane protein 70 [Source:HGNC Symbol;Acc:HGNC:26050]
novel.736	-	-1.44386	0.00247817	- && - && -
ENSG00000214695	NPAP1P2	-5.61426	0.00247817	nuclear pore associated protein 1 pseudogene 2 [Source:HGNC Symbol;Acc:HGNC:45019]
ENSG00000170421	KRT8	-1.36352	0.00247817	keratin 8 [Source:HGNC Symbol;Acc:HGNC:6446]
ENSG00000250101	AC106795.3	-3.79803	0.00298427	novel transcript
novel.1602	-	2.1618	0.00299841	- && P01871.3 RecName: Full=Ig mu chain C region && -
ENSG00000218018	AL109955.1	-1.12931	0.00299841	novel transcript
ENSG00000229816	DDX50P1	3.14597	0.00359096	DEAD-box helicase 50 pseudogene 1 [Source:HGNC Symbol;Acc:HGNC:18974]
ENSG00000223551	TMSB4XP4	2.26536	0.00406958	TMSB4X pseudogene 4 [Source:HGNC Symbol;Acc:HGNC:11886]
ENSG00000246334	PRR7-AS1	-1.04046	0.00429853	PRR7 antisense RNA 1 [Source:HGNC Symbol;Acc:HGNC:27961]
ENSG00000250787	HMGN1P17	-3.48512	0.00443595	high mobility group nucleosome binding domain 1 pseudogene 17 [Source:HGNC Symbol;Acc:HGNC:39361]
ENSG00000210174	MT-TR	-1.41621	0.00500514	mitochondrially encoded tRNA-Arg (CGN) [Source:HGNC Symbol;Acc:HGNC:7496]
ENSG00000105388	CEACAM5	-5.01373	0.00534806	CEA cell adhesion molecule 5 [Source:HGNC Symbol;Acc:HGNC:1817]
ENSG00000106541	AGR2	-4.3338	0.0054	anterior gradient 2, protein disulphide isomerase family member [Source:HGNC Symbol;Acc:HGNC:328]
ENSG00000237973	MTCO1P12	-1.8494	0.00548255	MT-CO1 pseudogene 12 [Source:HGNC Symbol;Acc:HGNC:52014]
ENSG00000219073	CELA3B	-4.7177	0.00548255	chymotrypsin like elastase 3B [Source:HGNC Symbol;Acc:HGNC:15945]
ENSG00000119888	EPCAM	-4.20417	0.00548255	epithelial cell adhesion molecule [Source:HGNC Symbol;Acc:HGNC:11529]
ENSG00000275896	PRSS2	-4.48469	0.00642564	serine protease 2 [Source:HGNC Symbol;Acc:HGNC:9483]
novel.1053	-	-1.4753	0.00672302	- && - && -
ENSG00000166333	ILK	-1.31541	0.00672302	integrin linked kinase [Source:HGNC Symbol;Acc:HGNC:6040]
novel.1656	-	-2.8096	0.00703049	- && O00566.2 RecName: Full=U3 small nucleolar ribonucleoprotein protein MPP10; AltName: Full=M phase phosphoprotein 10 && PF04006:Mpp10 protein
ENSG00000282998	AC009975.2	-3.57638	0.00713407	novel transcript
ENSG00000092621	PHGDH	-2.59308	0.0074009	phosphoglycerate dehydrogenase [Source:HGNC Symbol;Acc:HGNC:8923]
ENSG00000168925	CTRB1	-4.82828	0.0074009	chymotrypsinogen B1 [Source:HGNC Symbol;Acc:HGNC:2521]
ENSG00000185883	ATP6V0C	-1.1092	0.0074009	ATPase H+ transporting V0 subunit c [Source:HGNC Symbol;Acc:HGNC:855]
ENSG00000210194	MT-TE	-1.54677	0.00767177	mitochondrially encoded tRNA-Glu (GAA/G) [Source:HGNC Symbol;Acc:HGNC:7479]
novel.432	-	-1.23725	0.00815528	- && - && -
ENSG00000178878	APOLD1	2.50227	0.0088485	apolipoprotein L domain containing 1 [Source:HGNC Symbol;Acc:HGNC:25268]
novel.1832	-	-4.49286	0.0088485	- && Q8N6C8.3 RecName: Full=Leukocyte immunoglobulin-like receptor subfamily A member 3; AltName: Full=CD85 antigen-like family member E; AltName: Full=Immunoglobulin-like transcript 6; Short=ILT-6; AltName: Full=Leukocyte immunoglobulin-like receptor 4; Short=LIR-4; AltName: Full=Monocyte inhibitory receptor HM43/HM31; AltName: CD_antigen=CD85e; Flags: Precursor && -
ENSG00000234851	RPL23AP42	-1.11186	0.00890925	ribosomal protein L23a pseudogene 42 [Source:HGNC Symbol;Acc:HGNC:35942]
ENSG00000227355	AL359644.1	-1.15305	0.00936026	novel transcript, antisense STOM
ENSG00000242534	IGKV2D-28	3.13213	0.00951734	immunoglobulin kappa variable 2D-28 [Source:HGNC Symbol;Acc:HGNC:5799]
ENSG00000096060	FKBP5	1.41787	0.0117938	FKBP prolyl isomerase 5 [Source:HGNC Symbol;Acc:HGNC:3721]
ENSG00000244265	SIAH2-AS1	-2.19931	0.0117938	SIAH2 antisense RNA 1 [Source:HGNC Symbol;Acc:HGNC:40526]
ENSG00000108551	RASD1	3.12842	0.0118422	ras related dexamethasone induced 1 [Source:HGNC Symbol;Acc:HGNC:15828]
ENSG00000204872	NAT8B	-1.10563	0.0118422	N-acetyltransferase 8B (putative, gene/pseudogene) [Source:HGNC Symbol;Acc:HGNC:30235]
ENSG00000227159	DDX11L16	-1.20687	0.0118422	DEAD/H-box helicase 11 like 16 [Source:HGNC Symbol;Acc:HGNC:37115]
ENSG00000118520	ARG1	2.77689	0.0120401	arginase 1 [Source:HGNC Symbol;Acc:HGNC:663]
ENSG00000183621	ZNF438	-1.22703	0.0120401	zinc finger protein 438 [Source:HGNC Symbol;Acc:HGNC:21029]
ENSG00000273691	AC087284.1	2.654	0.0121455	novel transcript, sense intronic to ZNF710
ENSG00000123358	NR4A1	1.29229	0.0121455	nuclear receptor subfamily 4 group A member 1 [Source:HGNC Symbol;Acc:HGNC:7980]
ENSG00000287927	AC100801.2	4.50527	0.0124919	novel transcript
ENSG00000276997	AL513314.2	2.7611	0.0127162	novel transcript
ENSG00000113721	PDGFRB	1.20545	0.0134415	platelet derived growth factor receptor beta [Source:HGNC Symbol;Acc:HGNC:8804]
ENSG00000223635	AL121990.1	-2.34768	0.0135335	novel transcript
ENSG00000197744	PTMAP2	-1.13229	0.0136042	prothymosin alpha pseudogene 2 [Source:HGNC Symbol;Acc:HGNC:9625]
ENSG00000156564	LRFN2	2.56406	0.015647	leucine rich repeat and fibronectin type III domain containing 2 [Source:HGNC Symbol;Acc:HGNC:21226]
ENSG00000151176	PLBD2	1.01393	0.0164095	phospholipase B domain containing 2 [Source:HGNC Symbol;Acc:HGNC:27283]
ENSG00000285768	LINC02849	-3.32638	0.0166598	long intergenic non-protein coding RNA 2849 [Source:HGNC Symbol;Acc:HGNC:54385]
ENSG00000121316	PLBD1	1.31121	0.0172344	phospholipase B domain containing 1 [Source:HGNC Symbol;Acc:HGNC:26215]
ENSG00000211827	TRDJ2	2.91729	0.0177487	T cell receptor delta joining 2 [Source:HGNC Symbol;Acc:HGNC:12258]
ENSG00000286579	AC023483.1	3.23385	0.0178045	novel transcript, antisense to SETMAR
ENSG00000213707	HMGB1P10	-1.30222	0.0178045	high mobility group box 1 pseudogene 10 [Source:HGNC Symbol;Acc:HGNC:4994]
novel.1409	-	3.91622	0.0182865	- && P06310.2 RecName: Full=Immunoglobulin kappa variable 2-30; AltName: Full=Ig kappa chain V-II region RPMI 6410; Flags: Precursor && -
ENSG00000235802	HCFC1-AS1	-1.05488	0.0186384	HCFC1 antisense RNA 1 [Source:HGNC Symbol;Acc:HGNC:40273]
ENSG00000211895	IGHA1	2.13685	0.0186384	immunoglobulin heavy constant alpha 1 [Source:HGNC Symbol;Acc:HGNC:5478]
novel.350	-	-1.2117	0.0186384	- && Q96J02.2 RecName: Full=E3 ubiquitin-protein ligase Itchy homolog; Short=Itch; AltName: Full=Atrophin-1-interacting protein 4; Short=AIP4; AltName: Full=HECT-type E3 ubiquitin transferase Itchy homolog; AltName: Full=NFE2-associated polypeptide 1; Short=NAPP1 && -
novel.1260	-	-1.45399	0.0186384	- && Q86U02.1 RecName: Full=Putative uncharacterized protein encoded by LINC00596 && -
ENSG00000248923	MTND5P11	-1.79539	0.0186384	MT-ND5 pseudogene 11 [Source:HGNC Symbol;Acc:HGNC:42273]
ENSG00000115386	REG1A	-4.36035	0.0186384	regenerating family member 1 alpha [Source:HGNC Symbol;Acc:HGNC:9951]
ENSG00000250031	AC009927.1	2.70763	0.0186384	protein tyrosine phosphatase, non-receptor type 11 (PTPN11) pseudogene
ENSG00000227487	NCAM1-AS1	2.56094	0.0186384	NCAM1 antisense RNA1 [Source:HGNC Symbol;Acc:HGNC:48675]
ENSG00000011465	DCN	-3.17024	0.0186384	decorin [Source:HGNC Symbol;Acc:HGNC:2705]
ENSG00000210191	MT-TL2	-1.27247	0.0186384	mitochondrially encoded tRNA-Leu (CUN) 2 [Source:HGNC Symbol;Acc:HGNC:7491]
ENSG00000164266	SPINK1	-3.03402	0.0186384	serine peptidase inhibitor Kazal type 1 [Source:HGNC Symbol;Acc:HGNC:11244]
ENSG00000123384	LRP1	1.31303	0.0186384	LDL receptor related protein 1 [Source:HGNC Symbol;Acc:HGNC:6692]
ENSG00000197582	GPX1P1	-1.39666	0.0186384	glutathione peroxidase pseudogene 1 [Source:HGNC Symbol;Acc:HGNC:4560]
ENSG00000215704	CELA2B	-2.56795	0.0186384	chymotrypsin like elastase 2B [Source:HGNC Symbol;Acc:HGNC:29995]
novel.1698	-	-1.22333	0.0186384	- && Q15155.5 RecName: Full=Nodal modulator 1; AltName: Full=pM5 protein; Flags: Precursor && -
ENSG00000125971	DYNLRB1	-1.27187	0.0186384	dynein light chain roadblock-type 1 [Source:HGNC Symbol;Acc:HGNC:15468]
ENSG00000213977	TAX1BP3	-2.36109	0.0186384	Tax1 binding protein 3 [Source:HGNC Symbol;Acc:HGNC:30684]
novel.2100	-	-3.7092	0.0186384	- && O00370.1 RecName: Full=LINE-1 retrotransposable element ORF2 protein; Short=ORF2p; Includes: RecName: Full=Reverse transcriptase; Includes: RecName: Full=Endonuclease && -
ENSG00000188257	PLA2G2A	-3.92152	0.0186384	phospholipase A2 group IIA [Source:HGNC Symbol;Acc:HGNC:9031]
ENSG00000110203	FOLR3	2.4572	0.0186426	folate receptor gamma [Source:HGNC Symbol;Acc:HGNC:3795]
ENSG00000198157	HMGN5	-1.16824	0.0186641	high mobility group nucleosome binding domain 5 [Source:HGNC Symbol;Acc:HGNC:8013]
ENSG00000261504	LINC01686	-1.08789	0.018834	long intergenic non-protein coding RNA 1686 [Source:HGNC Symbol;Acc:HGNC:27643]
ENSG00000255079	LINC02704	-1.21554	0.0192637	long intergenic non-protein coding RNA 2704 [Source:HGNC Symbol;Acc:HGNC:54220]
ENSG00000229677	AC018644.1	2.92219	0.0194574	ribosomal protein L17 (RPL17) pseudogene
ENSG00000218426	AL590867.2	-1.10032	0.0201602	60S ribosomal protein L27a (RPL27A) pseudogene
ENSG00000246100	LINC00900	2.22609	0.0201602	long intergenic non-protein coding RNA 900 [Source:HGNC Symbol;Acc:HGNC:27444]
novel.368	-	-1.21363	0.0201602	- && - && -
ENSG00000179751	SYCN	-4.22911	0.0207888	syncollin [Source:HGNC Symbol;Acc:HGNC:18442]
ENSG00000185339	TCN2	1.50145	0.0207888	transcobalamin 2 [Source:HGNC Symbol;Acc:HGNC:11653]
ENSG00000211677	IGLC2	1.55704	0.0209966	immunoglobulin lambda constant 2 [Source:HGNC Symbol;Acc:HGNC:5856]
ENSG00000260479	AC009145.1	-1.08094	0.0217173	novel transcript, sense intronic to WWOX
ENSG00000211679	IGLC3	1.93804	0.0221108	immunoglobulin lambda constant 3 (Kern-Oz+ marker) [Source:HGNC Symbol;Acc:HGNC:5857]
novel.263	-	3.82755	0.022497	- && - && -
ENSG00000258860	AL133163.2	-1.78343	0.022497	novel transcript
ENSG00000249119	MTND6P4	-2.97455	0.022497	MT-ND6 pseudogene 4 [Source:HGNC Symbol;Acc:HGNC:39467]
ENSG00000266010	GATA6-AS1	-3.26851	0.0226555	GATA6 antisense RNA 1 (head to head) [Source:HGNC Symbol;Acc:HGNC:48840]
ENSG00000093072	ADA2	1.02557	0.0232998	adenosine deaminase 2 [Source:HGNC Symbol;Acc:HGNC:1839]
ENSG00000260725	AC005307.1	-1.99093	0.0235225	novel transcript
novel.159	-	-1.80404	0.0239519	- && - && -
novel.581	-	-1.28251	0.0248183	- && Q8WTZ3.1 RecName: Full=Zinc finger protein ENSP00000375192 && -
ENSG00000010327	STAB1	1.08021	0.0249831	stabilin 1 [Source:HGNC Symbol;Acc:HGNC:18628]
ENSG00000249790	AC092490.1	-1.89072	0.0256689	novel transcript
ENSG00000235288	AC099329.1	-1.33224	0.0258969	novel transcript, antisense to CCBP2
ENSG00000113070	HBEGF	1.79305	0.0262886	heparin binding EGF like growth factor [Source:HGNC Symbol;Acc:HGNC:3059]
ENSG00000090382	LYZ	1.13863	0.0264147	lysozyme [Source:HGNC Symbol;Acc:HGNC:6740]
ENSG00000235501	AC105942.1	-2.65591	0.0269389	novel transcript
ENSG00000132205	EMILIN2	1.15721	0.0269389	elastin microfibril interfacer 2 [Source:HGNC Symbol;Acc:HGNC:19881]
ENSG00000232043	AL133230.2	2.38048	0.0282514	novel transcript, antisense to PTPN1
ENSG00000134463	ECHDC3	1.74671	0.0283398	enoyl-CoA hydratase domain containing 3 [Source:HGNC Symbol;Acc:HGNC:23489]
ENSG00000286806	AC080005.1	-2.48107	0.0286686	novel transcript
ENSG00000038427	VCAN	1.43119	0.0287545	versican [Source:HGNC Symbol;Acc:HGNC:2464]
ENSG00000230778	ANKRD63	-3.53836	0.0288463	ankyrin repeat domain 63 [Source:HGNC Symbol;Acc:HGNC:40027]
novel.1259	-	-2.93232	0.0288569	- && Q8WTZ3.1 RecName: Full=Zinc finger protein ENSP00000375192 && -
ENSG00000256331	NIFKP3	-1.48262	0.0288569	nucleolar protein interacting with the FHA domain of MKI67 pseudogene 3 [Source:HGNC Symbol;Acc:HGNC:44951]
novel.296	-	-1.56424	0.0288569	- && - && -
ENSG00000113924	HGD	-1.01098	0.0288759	homogentisate 1,2-dioxygenase [Source:HGNC Symbol;Acc:HGNC:4892]
ENSG00000116133	DHCR24	1.25102	0.0290695	24-dehydrocholesterol reductase [Source:HGNC Symbol;Acc:HGNC:2859]
ENSG00000246662	LINC00535	-2.60216	0.0292069	long intergenic non-protein coding RNA 535 [Source:HGNC Symbol;Acc:HGNC:43644]
ENSG00000241494	AL355032.1	-1.81218	0.0299552	ribosomal protein L26-like 1 (RPL26L1) pseudogene
ENSG00000163221	S100A12	1.45219	0.0306686	S100 calcium binding protein A12 [Source:HGNC Symbol;Acc:HGNC:10489]
ENSG00000250053	RARRES2P4	-2.35206	0.0306686	retinoic acid receptor responder 2 pseudogene 4 [Source:HGNC Symbol;Acc:HGNC:48703]
novel.240	-	-1.1309	0.0307059	- && - && -
ENSG00000226435	ANKRD18DP	-2.19381	0.0333613	ankyrin repeat domain 18D, pseudogene [Source:HGNC Symbol;Acc:HGNC:28016]
ENSG00000015592	STMN4	-1.74449	0.0333613	stathmin 4 [Source:HGNC Symbol;Acc:HGNC:16078]
ENSG00000142494	SLC47A1	1.8482	0.0336164	solute carrier family 47 member 1 [Source:HGNC Symbol;Acc:HGNC:25588]
novel.1300	-	-1.20076	0.0336164	- && Q96FF7.4 RecName: Full=Uncharacterized protein MISP3; AltName: Full=MISP family member 3 && -
ENSG00000267421	AC005498.2	-2.25145	0.0338718	novel transcript
ENSG00000138061	CYP1B1	1.28352	0.0338718	cytochrome P450 family 1 subfamily B member 1 [Source:HGNC Symbol;Acc:HGNC:2597]
ENSG00000116132	PRRX1	-3.28339	0.0338718	paired related homeobox 1 [Source:HGNC Symbol;Acc:HGNC:9142]
ENSG00000164675	IQUB	-1.29704	0.0338718	IQ motif and ubiquitin domain containing [Source:HGNC Symbol;Acc:HGNC:21995]
ENSG00000176697	BDNF	-1.18474	0.0338718	brain derived neurotrophic factor [Source:HGNC Symbol;Acc:HGNC:1033]
ENSG00000273141	AP001269.4	-1.21594	0.0338718	novel transcript, antisense to MPPE1
novel.625	-	2.70271	0.0338718	- && - && -
novel.519	-	-1.20723	0.0338718	- && - && -
ENSG00000210176	MT-TH	-1.08037	0.0338718	mitochondrially encoded tRNA-His (CAU/C) [Source:HGNC Symbol;Acc:HGNC:7487]
ENSG00000134470	IL15RA	1.07886	0.0338718	interleukin 15 receptor subunit alpha [Source:HGNC Symbol;Acc:HGNC:5978]
ENSG00000135226	UGT2B28	-1.44119	0.0338718	UDP glucuronosyltransferase family 2 member B28 [Source:HGNC Symbol;Acc:HGNC:13479]
ENSG00000210195	MT-TT	-1.33222	0.0338718	mitochondrially encoded tRNA-Thr (ACN) [Source:HGNC Symbol;Acc:HGNC:7499]
ENSG00000173597	SULT1B1	1.08099	0.0338718	sulfotransferase family 1B member 1 [Source:HGNC Symbol;Acc:HGNC:17845]
ENSG00000277075	H2AC8	-1.01185	0.0341469	H2A clustered histone 8 [Source:HGNC Symbol;Acc:HGNC:4724]
ENSG00000234117	AL445224.1	-1.27163	0.0341469	novel transcript, antisense to BET3L
ENSG00000210049	MT-TF	-1.48579	0.0343201	mitochondrially encoded tRNA-Phe (UUU/C) [Source:HGNC Symbol;Acc:HGNC:7481]
ENSG00000259918	NDUFA5P11	-1.4074	0.0344513	NADH:ubiquinone oxidoreductase subunit A5 pseudogene 11 [Source:HGNC Symbol;Acc:HGNC:48853]
ENSG00000198799	LRIG2	1.00912	0.0351606	leucine rich repeats and immunoglobulin like domains 2 [Source:HGNC Symbol;Acc:HGNC:20889]
ENSG00000273507	AL354809.1	2.31068	0.0354133	novel transcript
ENSG00000205336	ADGRG1	1.091	0.0356993	adhesion G protein-coupled receptor G1 [Source:HGNC Symbol;Acc:HGNC:4512]
ENSG00000282572	AC215522.2	-1.72987	0.0357498	novel transcript similar to family member with sequence similarity 157
ENSG00000286052	AL109955.2	-1.47353	0.0360914	novel transcript
ENSG00000211943	IGHV3-15	2.44338	0.0360914	immunoglobulin heavy variable 3-15 [Source:HGNC Symbol;Acc:HGNC:5582]
ENSG00000259556	AC090971.4	1.74215	0.0363903	Leo1, Paf1/RNA polymerase II complex component, homolog (S. cerevisiae) (LEO1) pseudogene
ENSG00000266401	AP002478.1	-1.02218	0.0363903	novel transcript, antisense to DLGAP1
ENSG00000258871	AC004828.1	-1.29039	0.0368952	novel transcript
ENSG00000134138	MEIS2	-2.40741	0.0369164	Meis homeobox 2 [Source:HGNC Symbol;Acc:HGNC:7001]
ENSG00000179165	PXT1	-1.10235	0.0370996	peroxisomal testis enriched protein 1 [Source:HGNC Symbol;Acc:HGNC:18312]
ENSG00000272620	AFAP1-AS1	-1.03432	0.0376801	AFAP1 antisense RNA 1 [Source:HGNC Symbol;Acc:HGNC:28141]
ENSG00000004468	CD38	1.05323	0.0391308	CD38 molecule [Source:HGNC Symbol;Acc:HGNC:1667]
ENSG00000225975	LINC01534	-1.00539	0.0394232	long intergenic non-protein coding RNA 1534 [Source:HGNC Symbol;Acc:HGNC:51281]
novel.1923	-	4.65343	0.0394232	- && P01699.2 RecName: Full=Immunoglobulin lambda variable 1-44; AltName: Full=Ig lambda chain V-I region MEM; AltName: Full=Ig lambda chain V-I region VOR; Flags: Precursor && -
ENSG00000170345	FOS	1.48185	0.0402555	Fos proto-oncogene, AP-1 transcription factor subunit [Source:HGNC Symbol;Acc:HGNC:3796]
ENSG00000210140	MT-TC	-1.23378	0.0402555	mitochondrially encoded tRNA-Cys (UGU/C) [Source:HGNC Symbol;Acc:HGNC:7477]
ENSG00000223972	DDX11L1	-1.09258	0.0411652	DEAD/H-box helicase 11 like 1 [Source:HGNC Symbol;Acc:HGNC:37102]
ENSG00000260118	AL157700.1	-2.39769	0.0417269	novel transcript
novel.2111	-	-1.95157	0.0420787	- && P62271.3 RecName: Full=40S ribosomal protein S18 >P62269.3 RecName: Full=40S ribosomal protein S18; AltName: Full=Ke-3; Short=Ke3 >P62272.3 RecName: Full=40S ribosomal protein S18 >P62270.3 RecName: Full=40S ribosomal protein S18; AltName: Full=Ke-3; Short=Ke3 >Q5TJE9.3 RecName: Full=40S ribosomal protein S18 >Q3T0R1.3 RecName: Full=40S ribosomal protein S18 >A5JST6.1 RecName: Full=40S ribos…
ENSG00000108950	FAM20A	1.77008	0.0424288	FAM20A golgi associated secretory pathway pseudokinase [Source:HGNC Symbol;Acc:HGNC:23015]
ENSG00000231952	DPY19L1P2	2.75162	0.0445124	DPY19L1 pseudogene 2 [Source:HGNC Symbol;Acc:HGNC:22851]
ENSG00000269924	AC024451.4	2.14894	0.0450429	novel transcript, sense intronic to KIAA0146
ENSG00000234425	AL138930.1	-1.13625	0.0452264	novel transcript
ENSG00000144649	GASK1A	-1.08199	0.0456717	golgi associated kinase 1A [Source:HGNC Symbol;Acc:HGNC:24485]
ENSG00000286522	H3C2	-1.14273	0.0457085	H3 clustered histone 2 [Source:HGNC Symbol;Acc:HGNC:4776]
ENSG00000089169	RPH3A	1.41389	0.0466608	rabphilin 3A [Source:HGNC Symbol;Acc:HGNC:17056]
ENSG00000157168	NRG1	1.40409	0.0467318	neuregulin 1 [Source:HGNC Symbol;Acc:HGNC:7997]
ENSG00000269194	AC006942.1	-2.48738	0.0467318	novel transcript, antisense to FUZ
ENSG00000248472	DDX11L9	-1.25196	0.048272	DEAD/H-box helicase 11 like 9 [Source:HGNC Symbol;Acc:HGNC:37109]
ENSG00000183090	FREM3	-1.52767	0.0485465	FRAS1 related extracellular matrix 3 [Source:HGNC Symbol;Acc:HGNC:25172]
ENSG00000186912	P2RY4	3.12294	0.0489204	pyrimidinergic receptor P2Y4 [Source:HGNC Symbol;Acc:HGNC:8542]
ENSG00000250992	AC139491.3	-2.2948	0.0489204	novel transcript
ENSG00000223519	KIF28P	-1.07798	0.0489204	kinesin family member 28, pseudogene [Source:HGNC Symbol;Acc:HGNC:49205]
ENSG00000110077	MS4A6A	1.02139	0.0489204	membrane spanning 4-domains A6A [Source:HGNC Symbol;Acc:HGNC:13375]
ENSG00000232724	TRIM80P	-1.34891	0.0499286	tripartite motif containing 80, pseudogene [Source:HGNC Symbol;Acc:HGNC:51490]
