# Supplementary material for: Tumor-Educated Platelets as a Promising Biomarker for Blood-Based Detection of Renal Cell Carcinoma
Source: Front Oncol. 2022 Mar 7;12:844520. doi: 10.3389/fonc.2022.844520 (PMC8936192; doi:10.3389/fonc.2022.844520)
Supplement: Supplementary file 7 [file Table_3.xlsx]

## Sheet: RCCvsH_all_GOenrich_significant
Table S3. the GO enrichment of the 203 DEGs between RCC and control groups
Category	GOID	Description	GeneRatio	BgRatio	pvalue	padj	geneID	geneName	Count	Up	Up_Gene_id	Down	Down_Gene_id
BP	GO:0006959	humoral immune response	12/87	285/15852	4.83436e-08	8.60999e-05	ENSG00000278196/ENSG00000170890/ENSG00000275896/ENSG00000242534/ENSG00000211895/ENSG00000115386/ENSG00000188257/ENSG00000211677/ENSG00000211679/ENSG00000090382/ENSG00000163221/ENSG00000211943	IGLV2-8/PLA2G1B/PRSS2/IGKV2D-28/IGHA1/REG1A/PLA2G2A/IGLC2/IGLC3/LYZ/S100A12/IGHV3-15	12	8	ENSG00000278196/ENSG00000242534/ENSG00000211895/ENSG00000211677/ENSG00000211679/ENSG00000090382/ENSG00000163221/ENSG00000211943	4	ENSG00000170890/ENSG00000275896/ENSG00000115386/ENSG00000188257
BP	GO:0019730	antimicrobial humoral response	7/87	90/15852	6.0672e-07	0.000540284	ENSG00000170890/ENSG00000275896/ENSG00000211895/ENSG00000115386/ENSG00000188257/ENSG00000090382/ENSG00000163221	PLA2G1B/PRSS2/IGHA1/REG1A/PLA2G2A/LYZ/S100A12	7	3	ENSG00000211895/ENSG00000090382/ENSG00000163221	4	ENSG00000170890/ENSG00000275896/ENSG00000115386/ENSG00000188257
BP	GO:0042742	defense response to bacterium	9/87	245/15852	7.80822e-06	0.00463548	ENSG00000170890/ENSG00000211895/ENSG00000188257/ENSG00000211677/ENSG00000211679/ENSG00000010327/ENSG00000090382/ENSG00000163221/ENSG00000211943	PLA2G1B/IGHA1/PLA2G2A/IGLC2/IGLC3/STAB1/LYZ/S100A12/IGHV3-15	9	7	ENSG00000211895/ENSG00000211677/ENSG00000211679/ENSG00000010327/ENSG00000090382/ENSG00000163221/ENSG00000211943	2	ENSG00000170890/ENSG00000188257
BP	GO:0071466	cellular response to xenobiotic stimulus	7/87	157/15852	2.46032e-05	0.00912954	ENSG00000120738/ENSG00000092621/ENSG00000118520/ENSG00000163221/ENSG00000138061/ENSG00000135226/ENSG00000173597	EGR1/PHGDH/ARG1/S100A12/CYP1B1/UGT2B28/SULT1B1	7	5	ENSG00000120738/ENSG00000118520/ENSG00000163221/ENSG00000138061/ENSG00000173597	2	ENSG00000092621/ENSG00000135226
BP	GO:0030307	positive regulation of cell growth	7/87	158/15852	2.56304e-05	0.00912954	ENSG00000275896/ENSG00000166333/ENSG00000115386/ENSG00000123384/ENSG00000113070/ENSG00000176697/ENSG00000004468	PRSS2/ILK/REG1A/LRP1/HBEGF/BDNF/CD38	7	3	ENSG00000123384/ENSG00000113070/ENSG00000004468	4	ENSG00000275896/ENSG00000166333/ENSG00000115386/ENSG00000176697
BP	GO:0006958	complement activation, classical pathway	6/87	115/15852	4.00296e-05	0.0118821	ENSG00000278196/ENSG00000242534/ENSG00000211895/ENSG00000211677/ENSG00000211679/ENSG00000211943	IGLV2-8/IGKV2D-28/IGHA1/IGLC2/IGLC3/IGHV3-15	6	6	ENSG00000278196/ENSG00000242534/ENSG00000211895/ENSG00000211677/ENSG00000211679/ENSG00000211943	0
BP	GO:0045927	positive regulation of growth	8/87	246/15852	6.10008e-05	0.0148668	ENSG00000106541/ENSG00000275896/ENSG00000166333/ENSG00000115386/ENSG00000123384/ENSG00000113070/ENSG00000176697/ENSG00000004468	AGR2/PRSS2/ILK/REG1A/LRP1/HBEGF/BDNF/CD38	8	3	ENSG00000123384/ENSG00000113070/ENSG00000004468	5	ENSG00000106541/ENSG00000275896/ENSG00000166333/ENSG00000115386/ENSG00000176697
BP	GO:0002455	humoral immune response mediated by circulating immunoglobulin	6/87	126/15852	6.67794e-05	0.0148668	ENSG00000278196/ENSG00000242534/ENSG00000211895/ENSG00000211677/ENSG00000211679/ENSG00000211943	IGLV2-8/IGKV2D-28/IGHA1/IGLC2/IGLC3/IGHV3-15	6	6	ENSG00000278196/ENSG00000242534/ENSG00000211895/ENSG00000211677/ENSG00000211679/ENSG00000211943	0
BP	GO:0036149	phosphatidylinositol acyl-chain remodeling	3/87	16/15852	8.49175e-05	0.0151602	ENSG00000170890/ENSG00000121316/ENSG00000188257	PLA2G1B/PLBD1/PLA2G2A	3	1	ENSG00000121316	2	ENSG00000170890/ENSG00000188257
BP	GO:0009410	response to xenobiotic stimulus	8/87	258/15852	8.51216e-05	0.0151602	ENSG00000120738/ENSG00000198695/ENSG00000092621/ENSG00000118520/ENSG00000163221/ENSG00000138061/ENSG00000135226/ENSG00000173597	EGR1/MT-ND6/PHGDH/ARG1/S100A12/CYP1B1/UGT2B28/SULT1B1	8	5	ENSG00000120738/ENSG00000118520/ENSG00000163221/ENSG00000138061/ENSG00000173597	3	ENSG00000198695/ENSG00000092621/ENSG00000135226
BP	GO:0060191	regulation of lipase activity	5/87	91/15852	0.000142314	0.0223549	ENSG00000175535/ENSG00000170890/ENSG00000113721/ENSG00000123384/ENSG00000176697	PNLIP/PLA2G1B/PDGFRB/LRP1/BDNF	5	2	ENSG00000113721/ENSG00000123384	3	ENSG00000175535/ENSG00000170890/ENSG00000176697
BP	GO:0006956	complement activation	6/87	146/15852	0.000150622	0.0223549	ENSG00000278196/ENSG00000242534/ENSG00000211895/ENSG00000211677/ENSG00000211679/ENSG00000211943	IGLV2-8/IGKV2D-28/IGHA1/IGLC2/IGLC3/IGHV3-15	6	6	ENSG00000278196/ENSG00000242534/ENSG00000211895/ENSG00000211677/ENSG00000211679/ENSG00000211943	0
BP	GO:0050900	leukocyte migration	10/87	462/15852	0.000215724	0.0278703	ENSG00000278196/ENSG00000170890/ENSG00000144668/ENSG00000105388/ENSG00000119888/ENSG00000242534/ENSG00000211895/ENSG00000211677/ENSG00000211679/ENSG00000163221	IGLV2-8/PLA2G1B/ITGA9/CEACAM5/EPCAM/IGKV2D-28/IGHA1/IGLC2/IGLC3/S100A12	10	6	ENSG00000278196/ENSG00000242534/ENSG00000211895/ENSG00000211677/ENSG00000211679/ENSG00000163221	4	ENSG00000170890/ENSG00000144668/ENSG00000105388/ENSG00000119888
BP	GO:0036152	phosphatidylethanolamine acyl-chain remodeling	3/87	23/15852	0.000261193	0.0278703	ENSG00000170890/ENSG00000121316/ENSG00000188257	PLA2G1B/PLBD1/PLA2G2A	3	1	ENSG00000121316	2	ENSG00000170890/ENSG00000188257
BP	GO:0072376	protein activation cascade	6/87	164/15852	0.000282976	0.0278703	ENSG00000278196/ENSG00000242534/ENSG00000211895/ENSG00000211677/ENSG00000211679/ENSG00000211943	IGLV2-8/IGKV2D-28/IGHA1/IGLC2/IGLC3/IGHV3-15	6	6	ENSG00000278196/ENSG00000242534/ENSG00000211895/ENSG00000211677/ENSG00000211679/ENSG00000211943	0
BP	GO:0016042	lipid catabolic process	8/87	308/15852	0.000286415	0.0278703	ENSG00000175535/ENSG00000137392/ENSG00000170890/ENSG00000151176/ENSG00000121316/ENSG00000123384/ENSG00000188257/ENSG00000138061	PNLIP/CLPS/PLA2G1B/PLBD2/PLBD1/LRP1/PLA2G2A/CYP1B1	8	4	ENSG00000151176/ENSG00000121316/ENSG00000123384/ENSG00000138061	4	ENSG00000175535/ENSG00000137392/ENSG00000170890/ENSG00000188257
BP	GO:0006805	xenobiotic metabolic process	5/87	106/15852	0.000290794	0.0278703	ENSG00000092621/ENSG00000163221/ENSG00000138061/ENSG00000135226/ENSG00000173597	PHGDH/S100A12/CYP1B1/UGT2B28/SULT1B1	5	3	ENSG00000163221/ENSG00000138061/ENSG00000173597	2	ENSG00000092621/ENSG00000135226
BP	GO:0098542	defense response to other organism	10/87	480/15852	0.000292867	0.0278703	ENSG00000170890/ENSG00000118520/ENSG00000211895/ENSG00000188257/ENSG00000211677/ENSG00000211679/ENSG00000010327/ENSG00000090382/ENSG00000163221/ENSG00000211943	PLA2G1B/ARG1/IGHA1/PLA2G2A/IGLC2/IGLC3/STAB1/LYZ/S100A12/IGHV3-15	10	8	ENSG00000118520/ENSG00000211895/ENSG00000211677/ENSG00000211679/ENSG00000010327/ENSG00000090382/ENSG00000163221/ENSG00000211943	2	ENSG00000170890/ENSG00000188257
BP	GO:0036151	phosphatidylcholine acyl-chain remodeling	3/87	24/15852	0.000297325	0.0278703	ENSG00000170890/ENSG00000121316/ENSG00000188257	PLA2G1B/PLBD1/PLA2G2A	3	1	ENSG00000121316	2	ENSG00000170890/ENSG00000188257
BP	GO:0050853	B cell receptor signaling pathway	5/87	108/15852	0.000317126	0.0282401	ENSG00000211895/ENSG00000211677/ENSG00000211679/ENSG00000211943/ENSG00000004468	IGHA1/IGLC2/IGLC3/IGHV3-15/CD38	5	5	ENSG00000211895/ENSG00000211677/ENSG00000211679/ENSG00000211943/ENSG00000004468	0
BP	GO:0001101	response to acid chemical	8/87	323/15852	0.000393735	0.0333924	ENSG00000178445/ENSG00000120738/ENSG00000170421/ENSG00000118520/ENSG00000113721/ENSG00000115386/ENSG00000004468/ENSG00000186912	GLDC/EGR1/KRT8/ARG1/PDGFRB/REG1A/CD38/P2RY4	8	6	ENSG00000178445/ENSG00000120738/ENSG00000118520/ENSG00000113721/ENSG00000004468/ENSG00000186912	2	ENSG00000170421/ENSG00000115386
BP	GO:0007586	digestion	5/87	116/15852	0.000440923	0.0343787	ENSG00000175535/ENSG00000243480/ENSG00000137392/ENSG00000275896/ENSG00000168925	PNLIP/AMY2A/CLPS/PRSS2/CTRB1	5	0		5	ENSG00000175535/ENSG00000243480/ENSG00000137392/ENSG00000275896/ENSG00000168925
BP	GO:0010517	regulation of phospholipase activity	4/87	65/15852	0.000443969	0.0343787	ENSG00000170890/ENSG00000113721/ENSG00000123384/ENSG00000176697	PLA2G1B/PDGFRB/LRP1/BDNF	4	2	ENSG00000113721/ENSG00000123384	2	ENSG00000170890/ENSG00000176697
BP	GO:0060193	positive regulation of lipase activity	4/87	66/15852	0.000470648	0.0347806	ENSG00000175535/ENSG00000170890/ENSG00000113721/ENSG00000176697	PNLIP/PLA2G1B/PDGFRB/BDNF	4	1	ENSG00000113721	3	ENSG00000175535/ENSG00000170890/ENSG00000176697
BP	GO:0006910	phagocytosis, recognition	4/87	67/15852	0.00049845	0.0347806	ENSG00000211895/ENSG00000211677/ENSG00000211679/ENSG00000211943	IGHA1/IGLC2/IGLC3/IGHV3-15	4	4	ENSG00000211895/ENSG00000211677/ENSG00000211679/ENSG00000211943	0
BP	GO:0008037	cell recognition	6/87	183/15852	0.000507745	0.0347806	ENSG00000211895/ENSG00000211677/ENSG00000211679/ENSG00000038427/ENSG00000176697/ENSG00000211943	IGHA1/IGLC2/IGLC3/VCAN/BDNF/IGHV3-15	6	5	ENSG00000211895/ENSG00000211677/ENSG00000211679/ENSG00000038427/ENSG00000211943	1	ENSG00000176697
BP	GO:0006909	phagocytosis	8/87	343/15852	0.000585712	0.0386353	ENSG00000278196/ENSG00000242534/ENSG00000211895/ENSG00000123384/ENSG00000211677/ENSG00000211679/ENSG00000134470/ENSG00000211943	IGLV2-8/IGKV2D-28/IGHA1/LRP1/IGLC2/IGLC3/IL15RA/IGHV3-15	8	8	ENSG00000278196/ENSG00000242534/ENSG00000211895/ENSG00000123384/ENSG00000211677/ENSG00000211679/ENSG00000134470/ENSG00000211943	0
BP	GO:0050871	positive regulation of B cell activation	5/87	127/15852	0.000666743	0.0424096	ENSG00000211895/ENSG00000211677/ENSG00000211679/ENSG00000211943/ENSG00000004468	IGHA1/IGLC2/IGLC3/IGHV3-15/CD38	5	5	ENSG00000211895/ENSG00000211677/ENSG00000211679/ENSG00000211943/ENSG00000004468	0
BP	GO:0070570	regulation of neuron projection regeneration	3/87	32/15852	0.000705893	0.0433515	ENSG00000123384/ENSG00000116132/ENSG00000198799	LRP1/PRRX1/LRIG2	3	2	ENSG00000123384/ENSG00000198799	1	ENSG00000116132
BP	GO:0016064	immunoglobulin mediated immune response	6/87	197/15852	0.0007479	0.0444003	ENSG00000278196/ENSG00000242534/ENSG00000211895/ENSG00000211677/ENSG00000211679/ENSG00000211943	IGLV2-8/IGKV2D-28/IGHA1/IGLC2/IGLC3/IGHV3-15	6	6	ENSG00000278196/ENSG00000242534/ENSG00000211895/ENSG00000211677/ENSG00000211679/ENSG00000211943	0
BP	GO:0019724	B cell mediated immunity	6/87	199/15852	0.000788357	0.0452924	ENSG00000278196/ENSG00000242534/ENSG00000211895/ENSG00000211677/ENSG00000211679/ENSG00000211943	IGLV2-8/IGKV2D-28/IGHA1/IGLC2/IGLC3/IGHV3-15	6	6	ENSG00000278196/ENSG00000242534/ENSG00000211895/ENSG00000211677/ENSG00000211679/ENSG00000211943	0
CC	GO:0005775	vacuolar lumen	9/90	164/16552	2.62625e-07	5.48887e-05	ENSG00000275896/ENSG00000118520/ENSG00000113721/ENSG00000151176/ENSG00000011465/ENSG00000185339/ENSG00000093072/ENSG00000090382/ENSG00000038427	PRSS2/ARG1/PDGFRB/PLBD2/DCN/TCN2/ADA2/LYZ/VCAN	9	7	ENSG00000118520/ENSG00000113721/ENSG00000151176/ENSG00000185339/ENSG00000093072/ENSG00000090382/ENSG00000038427	2	ENSG00000275896/ENSG00000011465
CC	GO:0019814	immunoglobulin complex	6/90	130/16552	7.58746e-05	0.00672238	ENSG00000278196/ENSG00000242534/ENSG00000211895/ENSG00000211677/ENSG00000211679/ENSG00000211943	IGLV2-8/IGKV2D-28/IGHA1/IGLC2/IGLC3/IGHV3-15	6	6	ENSG00000278196/ENSG00000242534/ENSG00000211895/ENSG00000211677/ENSG00000211679/ENSG00000211943	0
CC	GO:0043202	lysosomal lumen	5/90	91/16552	0.000136749	0.00672238	ENSG00000113721/ENSG00000151176/ENSG00000011465/ENSG00000185339/ENSG00000038427	PDGFRB/PLBD2/DCN/TCN2/VCAN	5	4	ENSG00000113721/ENSG00000151176/ENSG00000185339/ENSG00000038427	1	ENSG00000011465
CC	GO:0005766	primary lysosome	6/90	149/16552	0.000160823	0.00672238	ENSG00000162896/ENSG00000275896/ENSG00000185883/ENSG00000118520/ENSG00000093072/ENSG00000090382	PIGR/PRSS2/ATP6V0C/ARG1/ADA2/LYZ	6	3	ENSG00000118520/ENSG00000093072/ENSG00000090382	3	ENSG00000162896/ENSG00000275896/ENSG00000185883
CC	GO:0042582	azurophil granule	6/90	149/16552	0.000160823	0.00672238	ENSG00000162896/ENSG00000275896/ENSG00000185883/ENSG00000118520/ENSG00000093072/ENSG00000090382	PIGR/PRSS2/ATP6V0C/ARG1/ADA2/LYZ	6	3	ENSG00000118520/ENSG00000093072/ENSG00000090382	3	ENSG00000162896/ENSG00000275896/ENSG00000185883
CC	GO:0042571	immunoglobulin complex, circulating	4/90	55/16552	0.000225543	0.00785641	ENSG00000211895/ENSG00000211677/ENSG00000211679/ENSG00000211943	IGHA1/IGLC2/IGLC3/IGHV3-15	4	4	ENSG00000211895/ENSG00000211677/ENSG00000211679/ENSG00000211943	0
CC	GO:0016323	basolateral plasma membrane	6/90	216/16552	0.00115335	0.0336952	ENSG00000144668/ENSG00000105388/ENSG00000119888/ENSG00000123384/ENSG00000004468/ENSG00000186912	ITGA9/CEACAM5/EPCAM/LRP1/CD38/P2RY4	6	3	ENSG00000123384/ENSG00000004468/ENSG00000186912	3	ENSG00000144668/ENSG00000105388/ENSG00000119888
CC	GO:0035578	azurophil granule lumen	4/90	87/16552	0.00128977	0.0336952	ENSG00000275896/ENSG00000118520/ENSG00000093072/ENSG00000090382	PRSS2/ARG1/ADA2/LYZ	4	3	ENSG00000118520/ENSG00000093072/ENSG00000090382	1	ENSG00000275896
MF	GO:0003823	antigen binding	7/86	135/16175	7.49237e-06	0.00185062	ENSG00000278196/ENSG00000242534/ENSG00000211895/ENSG00000211677/ENSG00000211679/ENSG00000116133/ENSG00000211943	IGLV2-8/IGKV2D-28/IGHA1/IGLC2/IGLC3/DHCR24/IGHV3-15	7	7	ENSG00000278196/ENSG00000242534/ENSG00000211895/ENSG00000211677/ENSG00000211679/ENSG00000116133/ENSG00000211943	0
MF	GO:0005539	glycosaminoglycan binding	7/86	208/16175	0.000119583	0.0147685	ENSG00000115386/ENSG00000011465/ENSG00000093072/ENSG00000010327/ENSG00000113070/ENSG00000038427/ENSG00000205336	REG1A/DCN/ADA2/STAB1/HBEGF/VCAN/ADGRG1	7	5	ENSG00000093072/ENSG00000010327/ENSG00000113070/ENSG00000038427/ENSG00000205336	2	ENSG00000115386/ENSG00000011465
MF	GO:0034987	immunoglobulin receptor binding	4/86	58/16175	0.00025391	0.0209052	ENSG00000211895/ENSG00000211677/ENSG00000211679/ENSG00000211943	IGHA1/IGLC2/IGLC3/IGHV3-15	4	4	ENSG00000211895/ENSG00000211677/ENSG00000211679/ENSG00000211943	0
MF	GO:0016298	lipase activity	5/86	115/16175	0.000366538	0.0226337	ENSG00000175535/ENSG00000170890/ENSG00000151176/ENSG00000121316/ENSG00000188257	PNLIP/PLA2G1B/PLBD2/PLBD1/PLA2G2A	5	2	ENSG00000151176/ENSG00000121316	3	ENSG00000175535/ENSG00000170890/ENSG00000188257
MF	GO:0004252	serine-type endopeptidase activity	5/86	136/16175	0.000787938	0.0385649	ENSG00000142615/ENSG00000219073/ENSG00000275896/ENSG00000168925/ENSG00000215704	CELA2A/CELA3B/PRSS2/CTRB1/CELA2B	5	0		5	ENSG00000142615/ENSG00000219073/ENSG00000275896/ENSG00000168925/ENSG00000215704
MF	GO:0008083	growth factor activity	5/86	142/16175	0.000956815	0.0385649	ENSG00000115386/ENSG00000093072/ENSG00000113070/ENSG00000176697/ENSG00000157168	REG1A/ADA2/HBEGF/BDNF/NRG1	5	3	ENSG00000093072/ENSG00000113070/ENSG00000157168	2	ENSG00000115386/ENSG00000176697
MF	GO:0005041	low-density lipoprotein particle receptor activity	2/86	11/16175	0.00148964	0.0385649	ENSG00000123384/ENSG00000010327	LRP1/STAB1	2	2	ENSG00000123384/ENSG00000010327	0
MF	GO:0047498	calcium-dependent phospholipase A2 activity	2/86	11/16175	0.00148964	0.0385649	ENSG00000170890/ENSG00000188257	PLA2G1B/PLA2G2A	2	0		2	ENSG00000170890/ENSG00000188257
MF	GO:0008236	serine-type peptidase activity	5/86	157/16175	0.00149595	0.0385649	ENSG00000142615/ENSG00000219073/ENSG00000275896/ENSG00000168925/ENSG00000215704	CELA2A/CELA3B/PRSS2/CTRB1/CELA2B	5	0		5	ENSG00000142615/ENSG00000219073/ENSG00000275896/ENSG00000168925/ENSG00000215704
MF	GO:0004620	phospholipase activity	4/86	96/16175	0.00170592	0.0385649	ENSG00000170890/ENSG00000151176/ENSG00000121316/ENSG00000188257	PLA2G1B/PLBD2/PLBD1/PLA2G2A	4	2	ENSG00000151176/ENSG00000121316	2	ENSG00000170890/ENSG00000188257
MF	GO:0017171	serine hydrolase activity	5/86	162/16175	0.00171747	0.0385649	ENSG00000142615/ENSG00000219073/ENSG00000275896/ENSG00000168925/ENSG00000215704	CELA2A/CELA3B/PRSS2/CTRB1/CELA2B	5	0		5	ENSG00000142615/ENSG00000219073/ENSG00000275896/ENSG00000168925/ENSG00000215704
